# Supplementary material
Source: Copernicus journal article supplement (doi:10.5194/egusphere-2026-1146)
Supplement: Supplementary file 1 [file egusphere-2026-1146-supplement.pdf]

## Supplementary document

**Table S1: Summary of characteristics of Surface Mass Balance (SMB) estimates used for the computation of SMB loads, including temporal coverage, temporal resolution and spatial resolution.**

| Model        | Start_year | End_year | Spatial Resolution | Temporal Resolution |
|--------------|------------|----------|--------------------|---------------------|
| RACMO 27     | 1979       | 2022     | 27 km              | monthly             |
| RACMO 2DS    | 1979       | 2022     | 2 km               | monthly             |
| RACMO 11     | 1979       | 2023     | 11 km              | monthly             |
| MAR 35       | 1980       | 2022     | 35 km              | monthly             |
| GEMB 10      | 1979       | 2022     | 10 km              | monthly             |
| HIRHAM5 12.5 | 1979       | 2023     | 12.5 km            | monthly             |
| MERRA2       | 1980       | 2024     | 12.5 km            | 5 days              |

**5 Table S2: Summary of GNSS station details used in the study, showing station coordinates, start and end dates of observations, percentage of data availability, selected offset dates and preferred stochastic noise models used in time series analysis. Noise models are abbreviated as GGMWN, generalized Gauss-Markov plus white noise and PLWN, power-law plus white noise.**

| Station | Lat    | Lon    | Start date | End Date   | Date availability | Offset dates                             | Preferred Noise model |
|---------|--------|--------|------------|------------|-------------------|------------------------------------------|-----------------------|
| A368    | -74.29 | 66.79  | 14/01/2007 | 3/04/2010  | 77%               | None                                     | GGMWN                 |
| ABBZ    | -77.46 | 166.91 | 6/02/2004  | 31/12/2021 | 64%               | None                                     | PLWN                  |
| ABOA    | -73.04 | 346.59 | 1/02/2003  | 2/05/2021  | 89%               | 5/02/2010                                | PLWN                  |
| BACK    | -74.43 | 257.52 | 27/12/2011 | 31/12/2021 | 79%               | 19/12/2016,<br>19/12/2016,<br>16/01/2018 | PLWN                  |
| BELG    | -77.87 | 325.37 | 3/02/1998  | 31/12/2020 | 54%               | 15/02/2005,<br>17/10/2010,<br>13/02/2014 | PLWN                  |
| BENN    | -84.79 | 243.54 | 15/12/2010 | 31/12/2021 | 95%               | 31/12/2012,<br>06/12/2014                | GGMWN                 |
| BERP    | -74.55 | 248.12 | 11/01/2011 | 20/01/2021 | 91%               | None                                     | PLWN                  |
| BRIP    | -75.8  | 158.47 | 13/12/2007 | 5/02/2018  | 97%               | None                                     | GGMWN                 |
| BUMS    | -85.96 | 174.5  | 28/01/2014 | 29/01/2020 | 95%               | 05/02/2015,<br>22/01/2016                | GGMWN                 |
| CAPF    | -66.01 | 299.44 | 27/11/2012 | 31/12/2021 | 82%               | 16/11/2013                               | GGMWN                 |
| CLRK    | -77.34 | 218.13 | 4/01/2010  | 31/12/2021 | 92%               | None                                     | PLWN                  |
| CON2    | -77.53 | 167.09 | 17/12/2012 | 31/12/2021 | 88%               | None                                     | PLWN                  |
| CONG    | -77.53 | 167.09 | 21/12/2000 | 16/12/2012 | 60%               | 05/02/2004,<br>27/10/2004,<br>16/01/2012 | PLWN                  |
| COTE    | -77.81 | 162    | 29/01/2008 | 31/12/2021 | 96%               | 10/02/2017                               | GGMWN                 |
| CRDI    | -82.86 | 306.8  | 14/01/2010 | 31/12/2021 | 97%               | 24/12/2013,<br>07/12/2016,<br>11/12/2019 | GGMWN                 |
| DEVI    | -81.48 | 161.98 | 5/12/2008  | 11/02/2018 | 97%               | None                                     | GGMWN                 |
| DUM1    | -66.67 | 140    | 3/01/1998  | 20/03/2017 | 77%               | None                                     | PLWN                  |
| DUPT    | -64.8  | 297.18 | 3/04/2009  | 31/12/2021 | 99%               | None                                     | PLWN                  |

|      |        |        |            |            |     |                                                                                                                     |       |
|------|--------|--------|------------|------------|-----|---------------------------------------------------------------------------------------------------------------------|-------|
| EIG2 | -77.53 | 167.14 | 1/01/2003  | 13/04/2012 | 59% | 10/12/2002,<br>18/01/2004                                                                                           | PLWN  |
| FALL | -85.31 | 216.37 | 22/12/2009 | 21/07/2019 | 88% | None                                                                                                                | GGMWN |
| FLM5 | -77.53 | 160.27 | 25/11/2005 | 31/12/2021 | 89% | None                                                                                                                | PLWN  |
| FONP | -65.25 | 298.35 | 7/02/2010  | 31/07/2015 | 78% | None                                                                                                                | PLWN  |
| FTP4 | -78.93 | 162.56 | 7/01/2006  | 2/02/2020  | 98% | 6/12/2018                                                                                                           | PLWN  |
| GMEZ | -73.88 | 291.46 | 8/01/2010  | 31/12/2021 | 63% | None                                                                                                                | PLWN  |
| HAAG | -77.04 | 281.71 | 16/01/2010 | 31/12/2021 | 90% | 7/12/2019                                                                                                           | PLWN  |
| HOOZ | -77.53 | 166.93 | 2/01/2004  | 7/11/2014  | 63% | None                                                                                                                | PLWN  |
| HOWE | -87.42 | 210.57 | 1/01/2010  | 14/02/2020 | 94% | 06/12/2012,<br>14/12/2017                                                                                           | GGMWN |
| HOWN | -77.53 | 273.23 | 10/01/2008 | 31/12/2021 | 93% | 7/12/2019                                                                                                           | GGMWN |
| HTON | -74.08 | 298.27 | 1/03/2014  | 31/12/2021 | 60% | 01/03/2014,<br>18/01/2022                                                                                           | PLWN  |
| HUGO | -64.96 | 294.33 | 24/10/2009 | 25/05/2020 | 66% | 02/04/2009,<br>20/06/2009,<br>23/10/2009,<br>04/03/2017                                                             | PLWN  |
| IGGY | -83.31 | 156.25 | 28/01/2009 | 16/01/2017 | 94% | 31/01/2008,<br>29/01/2009,<br>18/11/2009,<br>24/12/2009,<br>22/01/2011,<br>29/01/2011,<br>23/01/2012,<br>28/01/2014 | GGMWN |
| JNSN | -73.08 | 293.9  | 30/12/2009 | 31/12/2021 | 50% | 30/12/2009,<br>12/11/2013,<br>13/12/2018,<br>25/01/2021                                                             | PLWN  |
| LEN1 | -69.5  | 159.4  | 24/01/2008 | 17/04/2012 | 68% | None                                                                                                                | GGMWN |
| LPLY | -73.11 | 269.7  | 14/12/2011 | 31/12/2021 | 95% | 21/12/2018                                                                                                          | PLWN  |
| LWN0 | -81.35 | 152.73 | 31/01/2008 | 7/02/2018  | 83% | None                                                                                                                | GGMWN |
| MACG | -77.53 | 167.25 | 4/02/2008  | 1/12/2015  | 86% | None                                                                                                                | PLWN  |
| MCAR | -76.32 | 215.7  | 6/01/2010  | 31/12/2021 | 92% | None                                                                                                                | PLWN  |
| MCG2 | -77.53 | 167.25 | 2/12/2015  | 15/10/2020 | 97% | 26/01/2018                                                                                                          | PLWN  |
| MCM4 | -77.84 | 166.67 | 25/01/1995 | 31/12/2021 | 92% | 07/09/1999,<br>03/01/2002,<br>19/05/2006                                                                            | PLWN  |
| MCMC | -77.84 | 166.67 | 18/10/2005 | 4/12/2017  | 96% | None                                                                                                                | PLWN  |
| MCMD | -77.84 | 166.67 | 3/11/2005  | 31/12/2021 | 95% | 05/01/2012,<br>03/11/2018                                                                                           | GGMWN |
| MIN0 | -78.65 | 167.16 | 31/01/2007 | 31/12/2021 | 86% | None                                                                                                                | PLWN  |
| NONS | -72.01 | 2.53   | 17/02/2011 | 1/01/2021  | 94% | None                                                                                                                | PLWN  |

|      |        |        |            |            |     |                                                                                       |       |
|------|--------|--------|------------|------------|-----|---------------------------------------------------------------------------------------|-------|
| OHI3 | -63.32 | 302.1  | 7/02/2003  | 31/12/2021 | 81% | 09/02/2010,<br>09/02/2012,<br>07/02/2013,<br>01/03/2014,<br>11/02/2015,<br>11/02/2019 | PLWN  |
| PAL2 | -64.78 | 295.95 | 4/09/2006  | 31/12/2021 | 94% | None                                                                                  | PLWN  |
| PALM | -64.78 | 295.95 | 23/04/1997 | 31/12/2021 | 90% | 08/03/2008,<br>14/07/2021                                                             | PLWN  |
| PALV | -64.78 | 295.95 | 4/04/2009  | 11/09/2017 | 91% | 24/09/2014                                                                            | PLWN  |
| PATN | -78.03 | 204.98 | 28/01/2010 | 16/11/2017 | 71% | 10/11/2015,<br>08/07/2016,<br>05/09/2017                                              | GGMWN |
| PECE | -85.61 | 291.44 | 15/01/2010 | 31/12/2021 | 91% | 14/01/2010,<br>07/12/2016,<br>14/12/2017,<br>09/12/2019                               | GGMWN |
| PHIG | -77.53 | 167.05 | 10/01/2013 | 31/12/2021 | 96% | None                                                                                  | PLWN  |
| PIRT | -81.1  | 274.86 | 30/12/2013 | 31/12/2021 | 90% | 25/11/2014                                                                            | GGMWN |
| PRPT | -66.01 | 294.66 | 4/05/2014  | 31/12/2021 | 96% | None                                                                                  | PLWN  |
| RAMG | -84.34 | 178.05 | 10/02/2008 | 27/01/2019 | 91% | None                                                                                  | GGMWN |
| RMBO | -83.87 | 293.61 | 6/01/2014  | 31/12/2021 | 98% | 11/12/2019,<br>11/12/2019                                                             | GGMWN |
| ROB4 | -77.03 | 163.19 | 30/11/2005 | 31/12/2021 | 98% | 14/11/2012                                                                            | PLWN  |
| ROBN | -65.25 | 300.56 | 6/02/2010  | 31/12/2021 | 77% | 17/02/2016                                                                            | PLWN  |
| ROTH | -67.57 | 291.87 | 3/01/2010  | 13/11/2021 | 74% | 14/03/2011                                                                            | PLWN  |
| SCTB | -77.85 | 166.76 | 29/10/2004 | 31/12/2021 | 96% | 26/10/2010,<br>17/09/2015,<br>01/11/2019                                              | PLWN  |
| SDLY | -77.14 | 234.03 | 9/01/2010  | 25/12/2020 | 83% | None                                                                                  | PLWN  |
| SMR5 | -68.13 | 292.9  | 26/02/2009 | 31/12/2020 | 83% | None                                                                                  | PLWN  |
| SMRT | -68.13 | 292.9  | 23/04/1999 | 26/02/2009 | 83% | 1/03/2007                                                                             | PLWN  |
| SPGT | -64.29 | 298.95 | 22/03/2013 | 31/12/2021 | 90% | None                                                                                  | PLWN  |
| STEW | -84.19 | 273.75 | 8/01/2014  | 31/12/2021 | 98% | 06/12/2014,<br>06/12/2016,<br>10/12/2019                                              | GGMWN |
| SVEA | -74.58 | 348.77 | 14/11/2004 | 2/02/2014  | 57% | 14/11/2004,<br>09/01/2010,<br>17/01/2013                                              | GGMWN |
| SYOG | -69.01 | 39.58  | 27/03/1995 | 31/12/2021 | 92% | 08/02/2000,<br>26/01/2007,<br>23/12/2013,<br>02/02/2014,<br>18/01/2020                | PLWN  |
| THUR | -72.53 | 262.44 | 19/01/2011 | 31/12/2021 | 92% | None                                                                                  | PLWN  |

|      |        |        |            |            |     |                                                                                                      |       |
|------|--------|--------|------------|------------|-----|------------------------------------------------------------------------------------------------------|-------|
| TNB1 | -74.7  | 164.1  | 24/11/1998 | 29/12/2021 | 68% | 28/11/2015                                                                                           | PLWN  |
| TNB2 | -74.7  | 164.1  | 2/01/2010  | 29/12/2021 | 67% | None                                                                                                 | GGMWN |
| TOMO | -75.8  | 245.34 | 1/02/2017  | 31/12/2021 | 78% | 14/12/2019                                                                                           | PLWN  |
| TRVE | -69.99 | 292.45 | 22/12/2009 | 31/12/2021 | 77% | 23/01/2021                                                                                           | PLWN  |
| VESL | -71.67 | 357.16 | 15/01/1998 | 31/12/2021 | 77% | 12/01/2008,<br>11/02/2010                                                                            | PLWN  |
| VL01 | -72.45 | 169.73 | 7/12/2014  | 31/12/2021 | 95% | None                                                                                                 | PLWN  |
| VL12 | -72.27 | 163.73 | 17/12/2014 | 31/12/2021 | 99% | None                                                                                                 | PLWN  |
| VL30 | -70.6  | 162.53 | 21/12/2014 | 31/12/2021 | 93% | None                                                                                                 | GGMWN |
| VNAD | -65.25 | 295.75 | 1/04/2009  | 17/02/2017 | 96% | None                                                                                                 | PLWN  |
| WHN0 | -79.85 | 154.22 | 16/12/2007 | 14/01/2017 | 93% | 09/11/2003,<br>13/12/2007,<br>01/02/2011,<br>09/02/2012                                              | GGMWN |
| WHTM | -82.68 | 255.61 | 19/01/2010 | 31/12/2021 | 87% | 27/11/2014,<br>30/12/2015,<br>19/12/2019                                                             | GGMWN |
| WILN | -80.04 | 279.44 | 12/01/2010 | 31/12/2021 | 95% | 28/12/2010,<br>01/01/2014,<br>12/12/2019                                                             | GGMWN |
| WLCH | -70.73 | 296.18 | 31/10/2012 | 31/12/2021 | 61% | 10/01/2010,<br>07/11/2013,<br>02/07/2017,<br>26/01/2021                                              | GGMWN |
| WLCT | -85.37 | 272.61 | 3/01/2014  | 31/12/2021 | 87% | 06/12/2014,<br>06/12/2016,<br>06/12/2017,<br>09/12/2019                                              | GGMWN |
| WWAY | -81.58 | 331.6  | 17/01/2014 | 12/12/2019 | 96% | 28/01/2002,<br>01/01/2006,<br>17/01/2014,<br>25/12/2014                                              | GGMWN |
| CAS1 | -66.28 | 110.52 | 1/01/1995  | 31/12/2021 | 91% | 05/02/2000,<br>03/12/2008,<br>13/11/2009,<br>11/12/2013,<br>22/05/2020,<br>07/07/2021                | PLWN  |
| DAV1 | -68.58 | 77.97  | 6/01/1995  | 31/12/2021 | 92% | 02/11/1999,<br>29/11/2000,<br>01/08/2007,<br>07/01/2009,<br>29/07/2009,<br>21/02/2011,<br>23/02/2017 | PLWN  |

|      |        |         |            |            |     |                                                                                       |       |
|------|--------|---------|------------|------------|-----|---------------------------------------------------------------------------------------|-------|
| MAW1 | -67.6  | 62.87   | 8/01/1995  | 31/12/2021 | 93% | 24/08/1999,<br>07/12/2004,<br>25/12/2006,<br>07/01/2009,<br>27/02/2018,<br>02/03/2020 | GGMWN |
| MAJK | -81.66 | -21.87  | 20/01/2018 | 31/12/2021 | 98% | 19/12/2018                                                                            | GGMWN |
| SGP1 | -65.56 | -61.72  | 28/02/2019 | 31/12/2021 | 95% | None                                                                                  | GGMWN |
| MBIO | -64.24 | -56.62  | 14/02/2013 | 31/12/2021 | 96% | 19/11/2013                                                                            | PLWN  |
| ARHT | -77.83 | 166.66  | 8/03/2018  | 31/12/2021 | 90% | None                                                                                  | GGMWN |
| SGP5 | -67.28 | -64.89  | 3/12/2018  | 31/12/2021 | 91% | None                                                                                  | GGMWN |
| SPRZ | -63.4  | -57     | 2/10/2016  | 31/12/2021 | 87% | 19/03/2019                                                                            | GGMWN |
| OHIG | -63.32 | -57.9   | 11/03/1995 | 18/02/2002 | 70% | 14/02/2000                                                                            | GGMWN |
| OHI2 | -63.32 | -57.9   | 14/02/2002 | 31/12/2021 | 83% | 23/02/2003,<br>12/11/2001,<br>30/01/2009,<br>02/03/2014,<br>02/06/2021                | PLWN  |
| DAL5 | -62.24 | -58.68  | 3/08/2017  | 31/12/2021 | 98% | None                                                                                  | PLWN  |
| THRO | -79.13 | -28.32  | 16/01/2018 | 8/08/2021  | 97% | 22/01/2019                                                                            | GGMWN |
| SUGG | -75.28 | -72.18  | 20/11/2011 | 31/01/2019 | 98% | 25/12/2014,<br>25/12/2016                                                             | GGMWN |
| GLDK | -72.23 | -100.59 | 28/12/2018 | 31/12/2021 | 82% | 31/12/2019                                                                            | GGMWN |
| MRTP | -74.18 | -115.1  | 16/12/2018 | 31/12/2021 | 94% | None                                                                                  | GGMWN |
| SGP4 | -66.69 | -62.46  | 20/12/2018 | 31/12/2021 | 80% | None                                                                                  | GGMWN |

Histogram of site durations

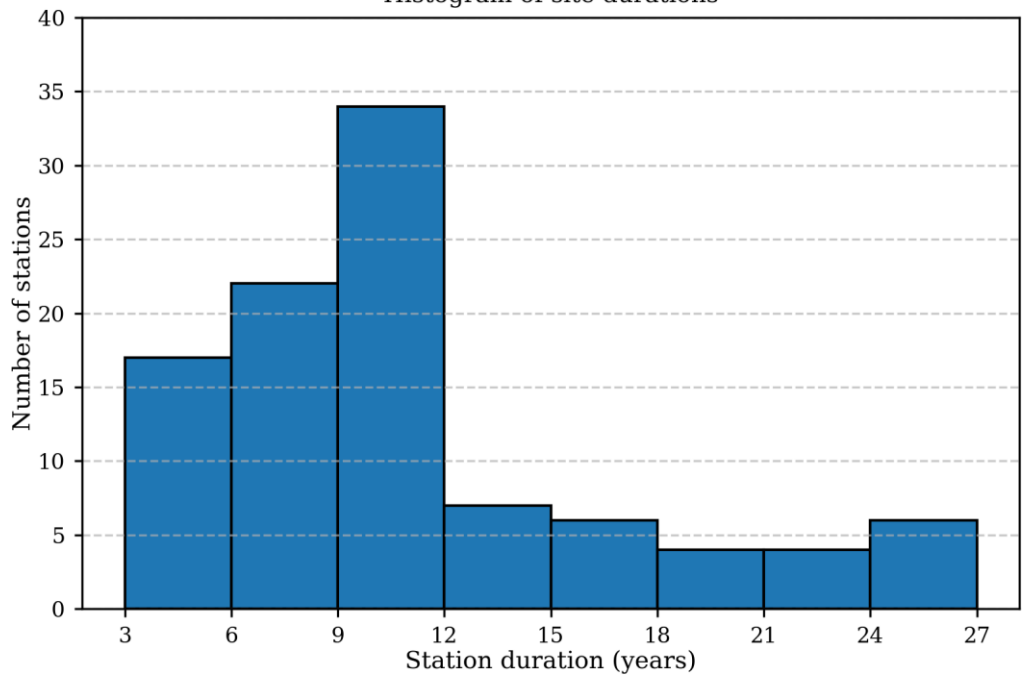

10 Figure S1: Histogram of site duration, considered for this study as shown with brown circles in Figure 2.

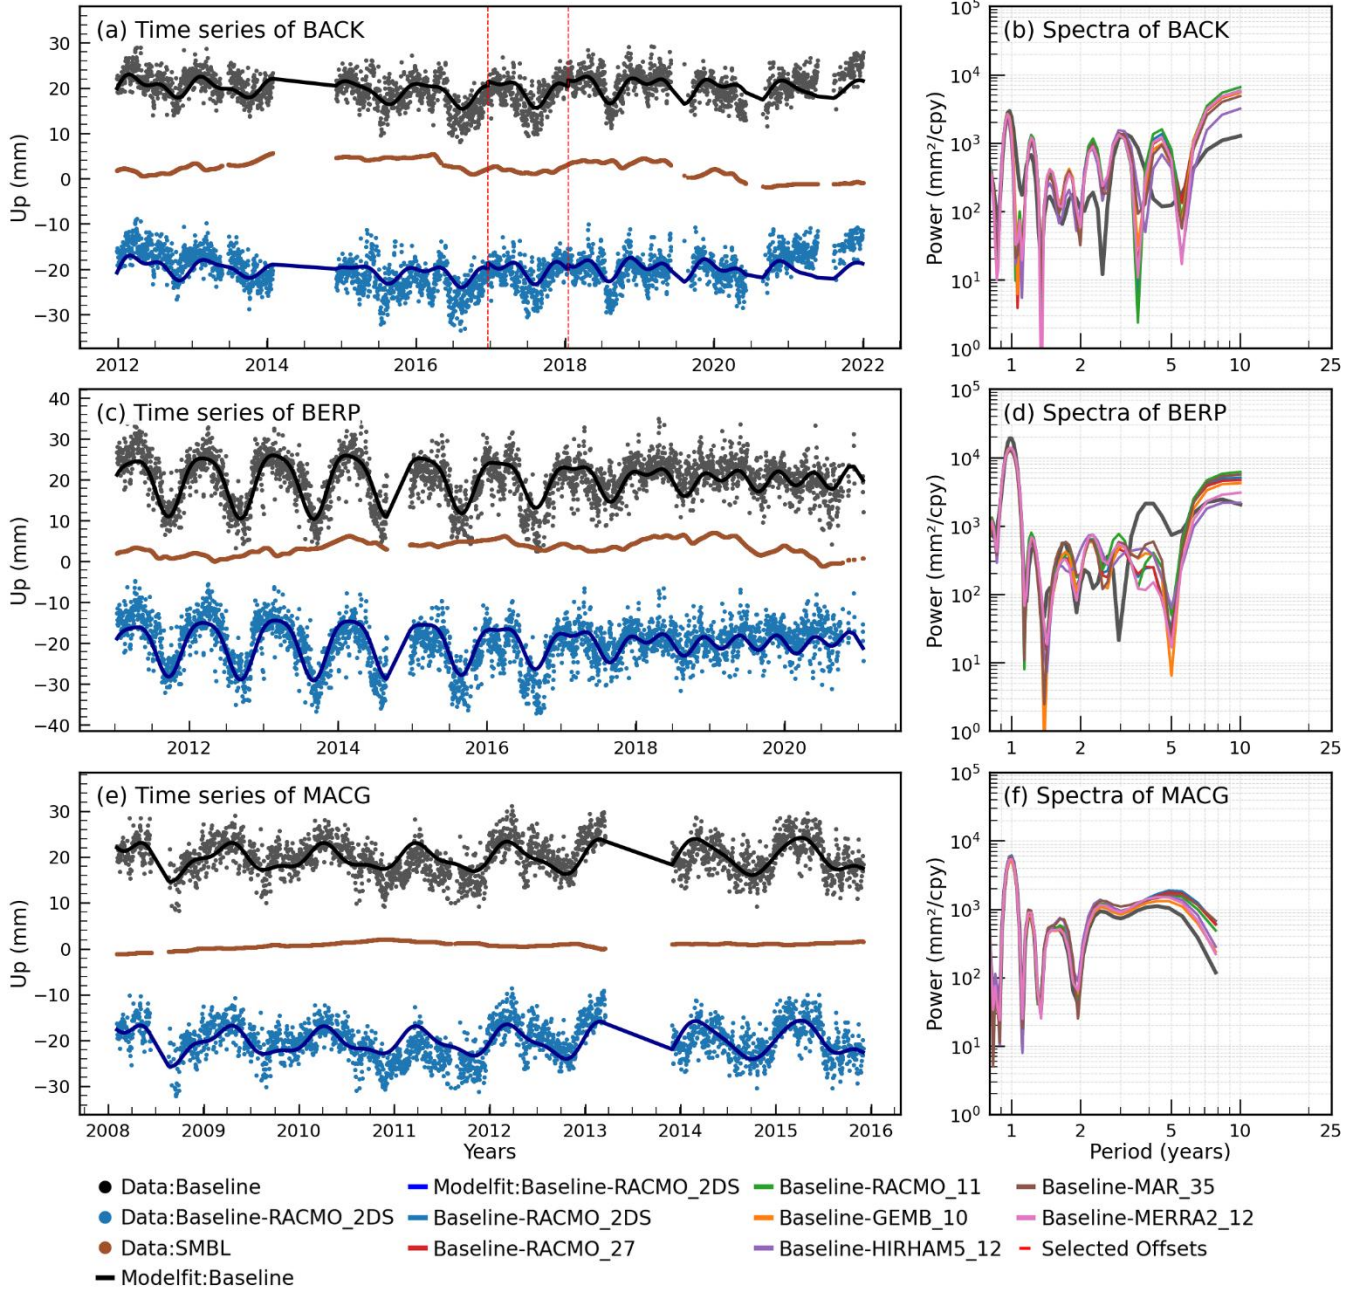

15 Figure S2: (Left Panels) Detrended vertical GPS time series for the stations BACK (a), BERP (c) and MACG (e). Gray dots correspond to detrended REGAIN vertical time series corrected for NTOL (REGAIN-NTOL; baseline) and vertically offset by +20 mm for visual clarity. Brown dots represent detrended SMBL time series from RACMO\_2DS model and the blue dots correspond to the resulting time series after applying the SMBL correction (REGAIN-NTOL-SMBL), vertically offset by -20 mm. Solid blue and black lines show the linear models estimated before (offset by +20 mm) and after (offset by -20 mm) SMBL correction, respectively. Red dashed lines mark the dates of identified offsets. The time series in panels (a), (c) and (e) span different observation periods. (Right Panels) Lomb-Scargle spectra for stations BACK (b) and BERP (d) and MACG (f).

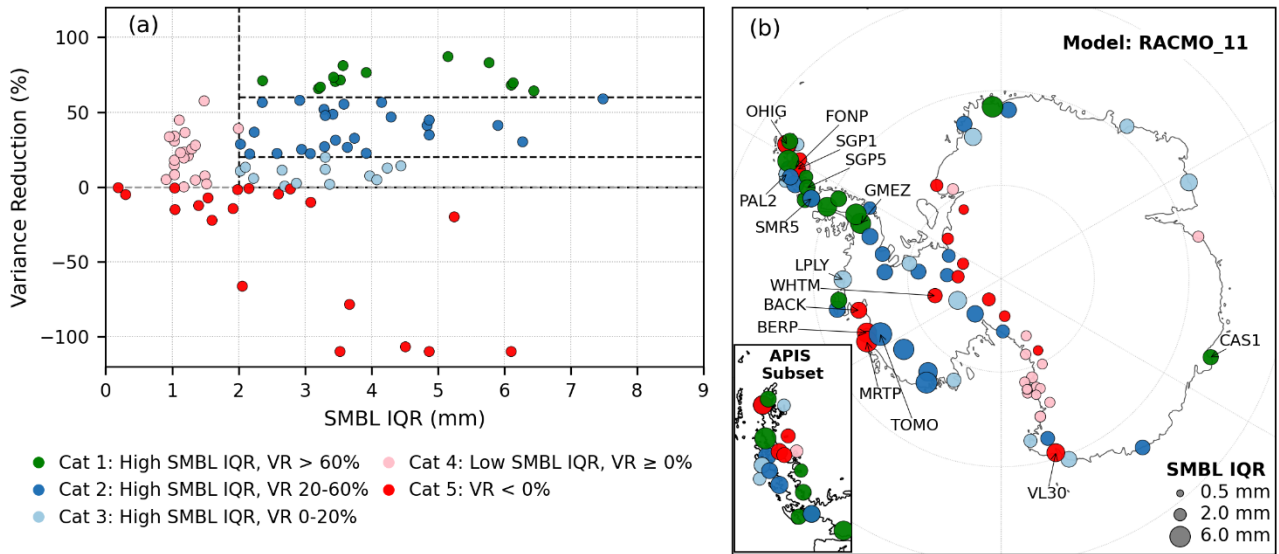

20 **Figure S3:** (a) Variance reduction at GPS stations as a function of SMBL IQR, for RACMO\_11 model. Colours reflect categorisation into five categories based on SMBL IQR and variance reduction of the model. (b) GPS sites with colours reflecting the same categories as in a) and symbol sizes reflecting SMBL IQR. GPS site names discussed in the text are annotated.

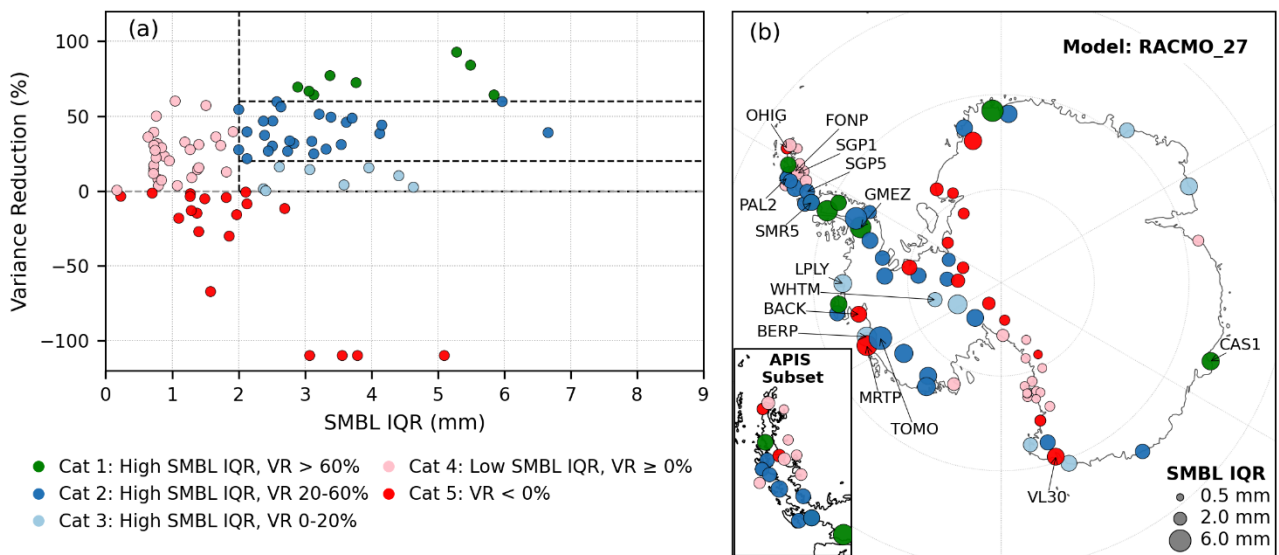

25 **Figure S4:** (a) Variance reduction at GPS stations as a function of SMBL IQR, for RACMO\_27 model. Colours reflect categorisation into five categories based on SMBL IQR and variance reduction of the model. (b) GPS sites with colours reflecting the same categories as in a) and symbol sizes reflecting SMBL IQR. GPS site names discussed in the text are annotated.

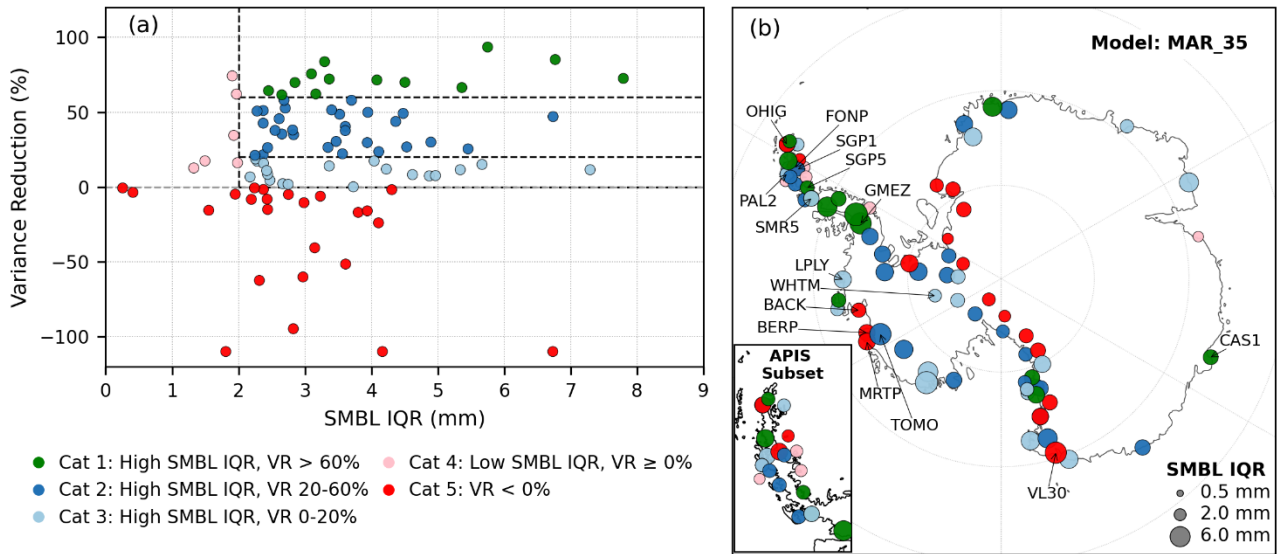

30 **Figure S5:** (a) Variance reduction at GPS stations as a function of SMBL IQR, for MAR\_35 model. Colours reflect categorisation into five categories based on SMBL IQR and variance reduction of the model. (b) GPS sites with colours reflecting the same categories as in a) and symbol sizes reflecting SMBL IQR. GPS site names discussed in the text are annotated.

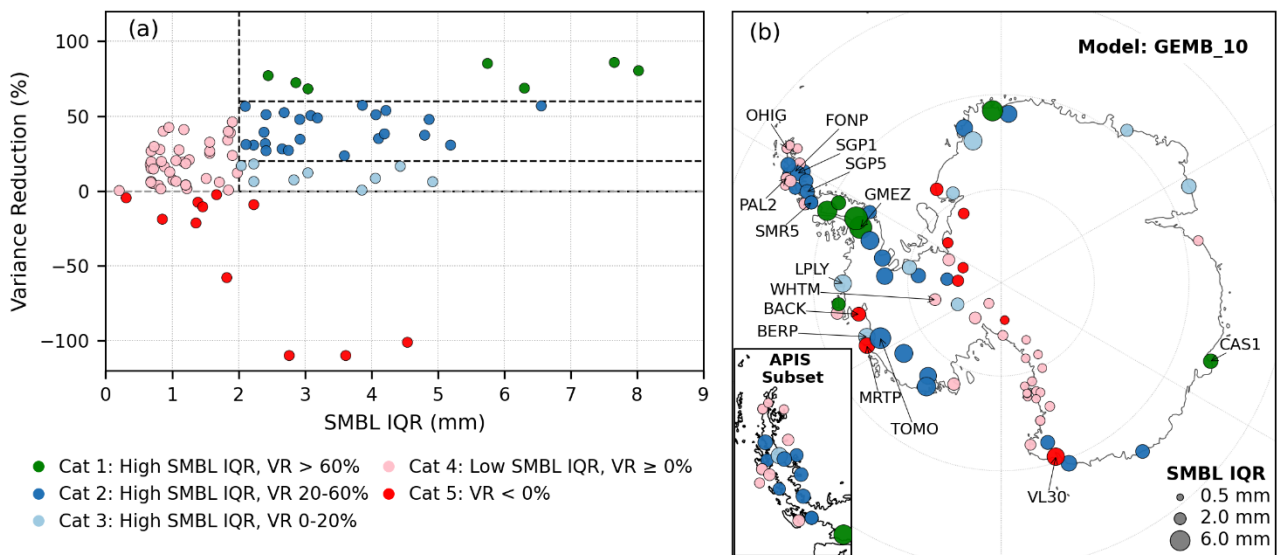

**Figure S6:** (a) Variance reduction at GPS stations as a function of SMBL IQR, for GEMB\_10 model. Colours reflect categorisation into five categories based on SMBL IQR and variance reduction of the model. (b) GPS sites with colours reflecting the same categories as in a) and symbol sizes reflecting SMBL IQR. GPS site names discussed in the text are annotated.

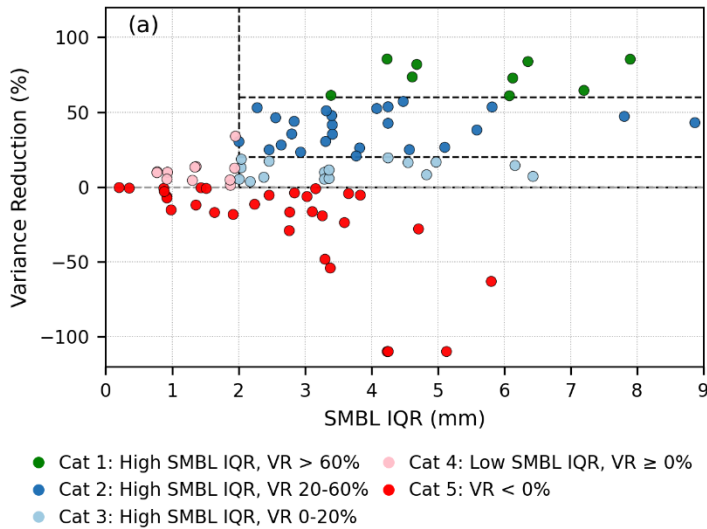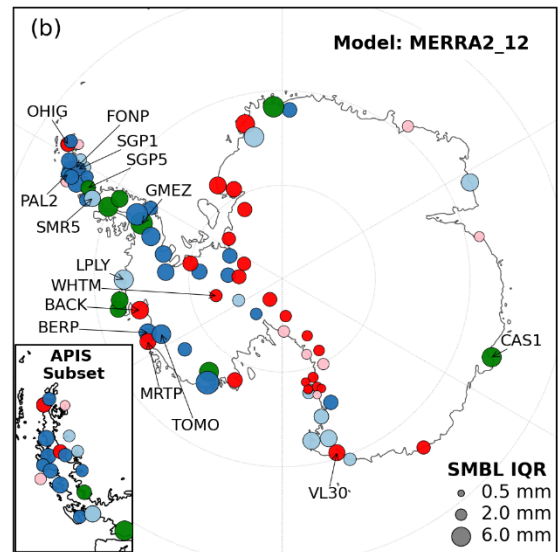

35

Figure S7: (a) Variance reduction at GPS stations as a function of SMBL IQR, for MERRA2\_12 model. Colours reflect categorisation into five categories based on SMBL IQR and variance reduction of the model. (b) GPS sites with colours reflecting the same categories as in a) and symbol sizes reflecting SMBL IQR. GPS site names discussed in the text are annotated.

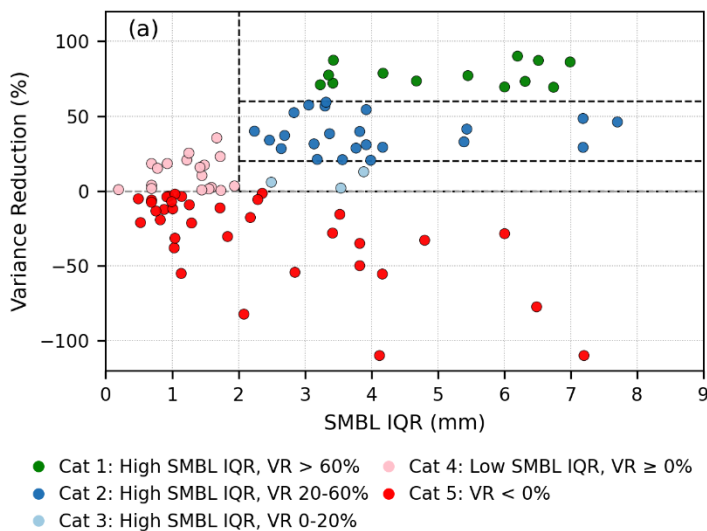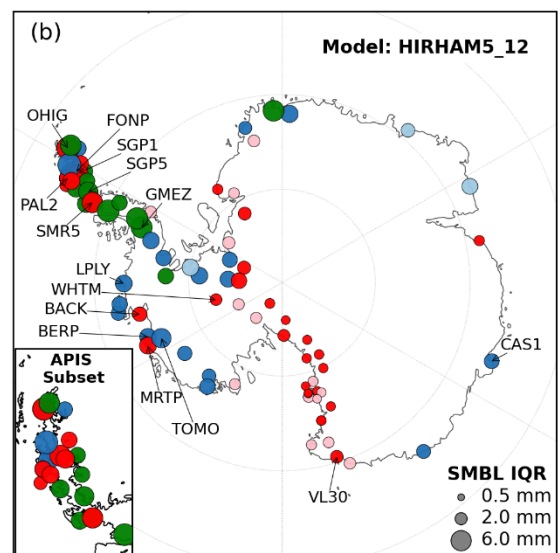

40

Figure S8: (a) Variance reduction at GPS stations as a function of SMBL IQR, for HIRHAM5\_12 model. Colours reflect categorisation into five categories based on SMBL IQR and variance reduction of the model. (b) GPS sites with colours reflecting the same categories as in a) and symbol sizes reflecting SMBL IQR. GPS site names discussed in the text are annotated.

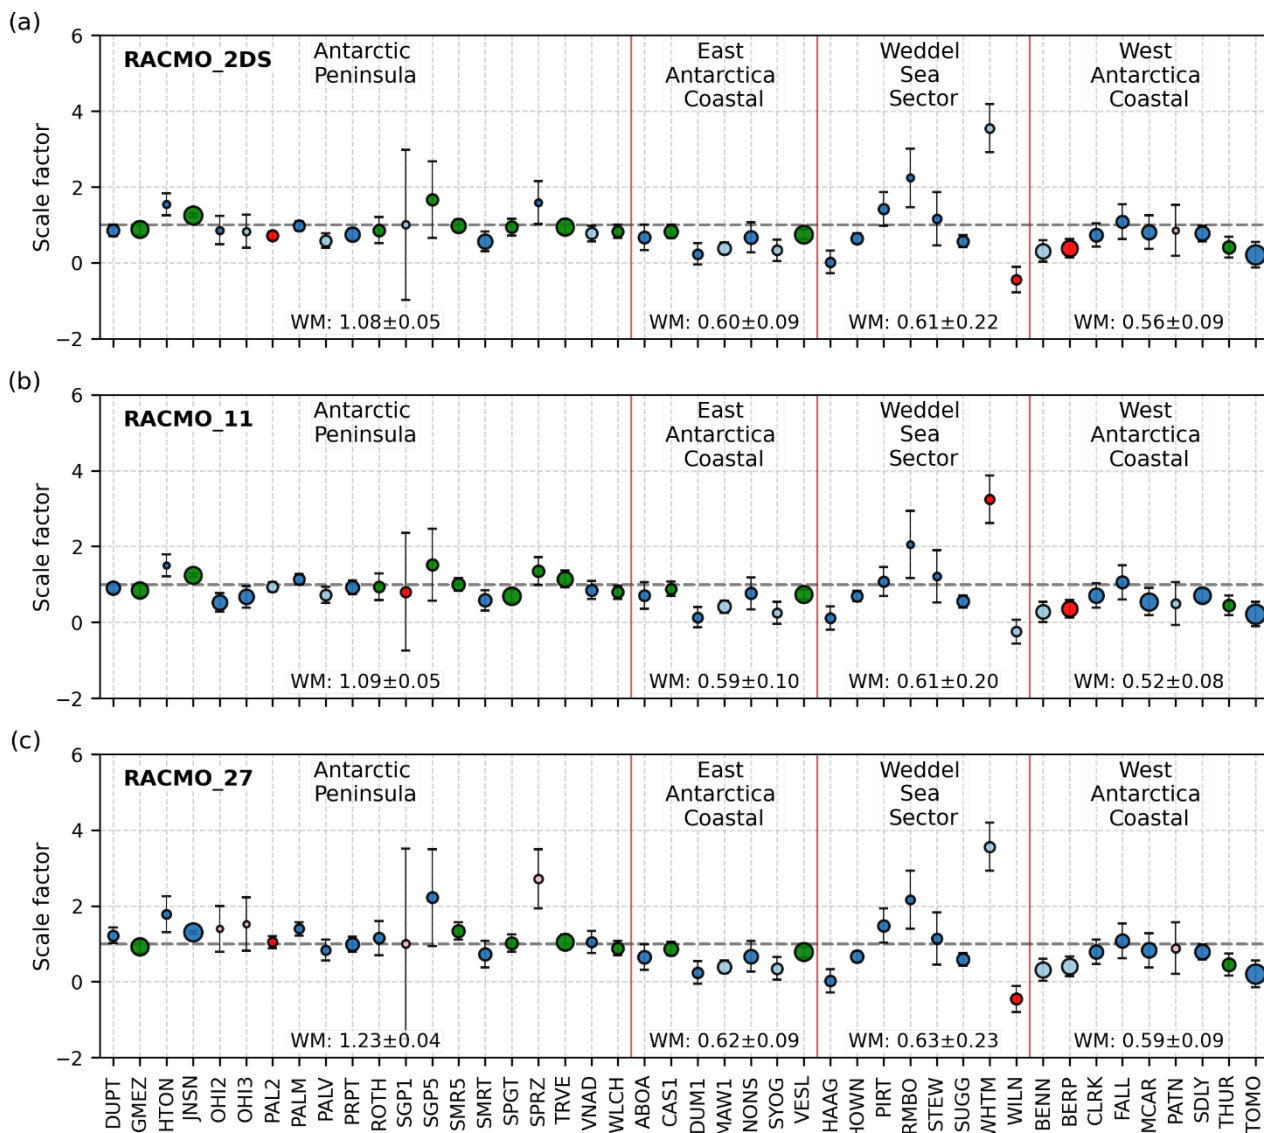

45 **Figure S9: Scale factors and associated uncertainty for (a) RACMO\_2DS (b) RACMO\_11 and (c) RACMO\_27 models grouped by geographical region. The size of the markers indicates the respective SMBL IQR and the colours indicates the categories of the sites as in Figure 5. Error bars indicate a 1-sigma uncertainty. The horizontal dashed line marks a scale of 1.**

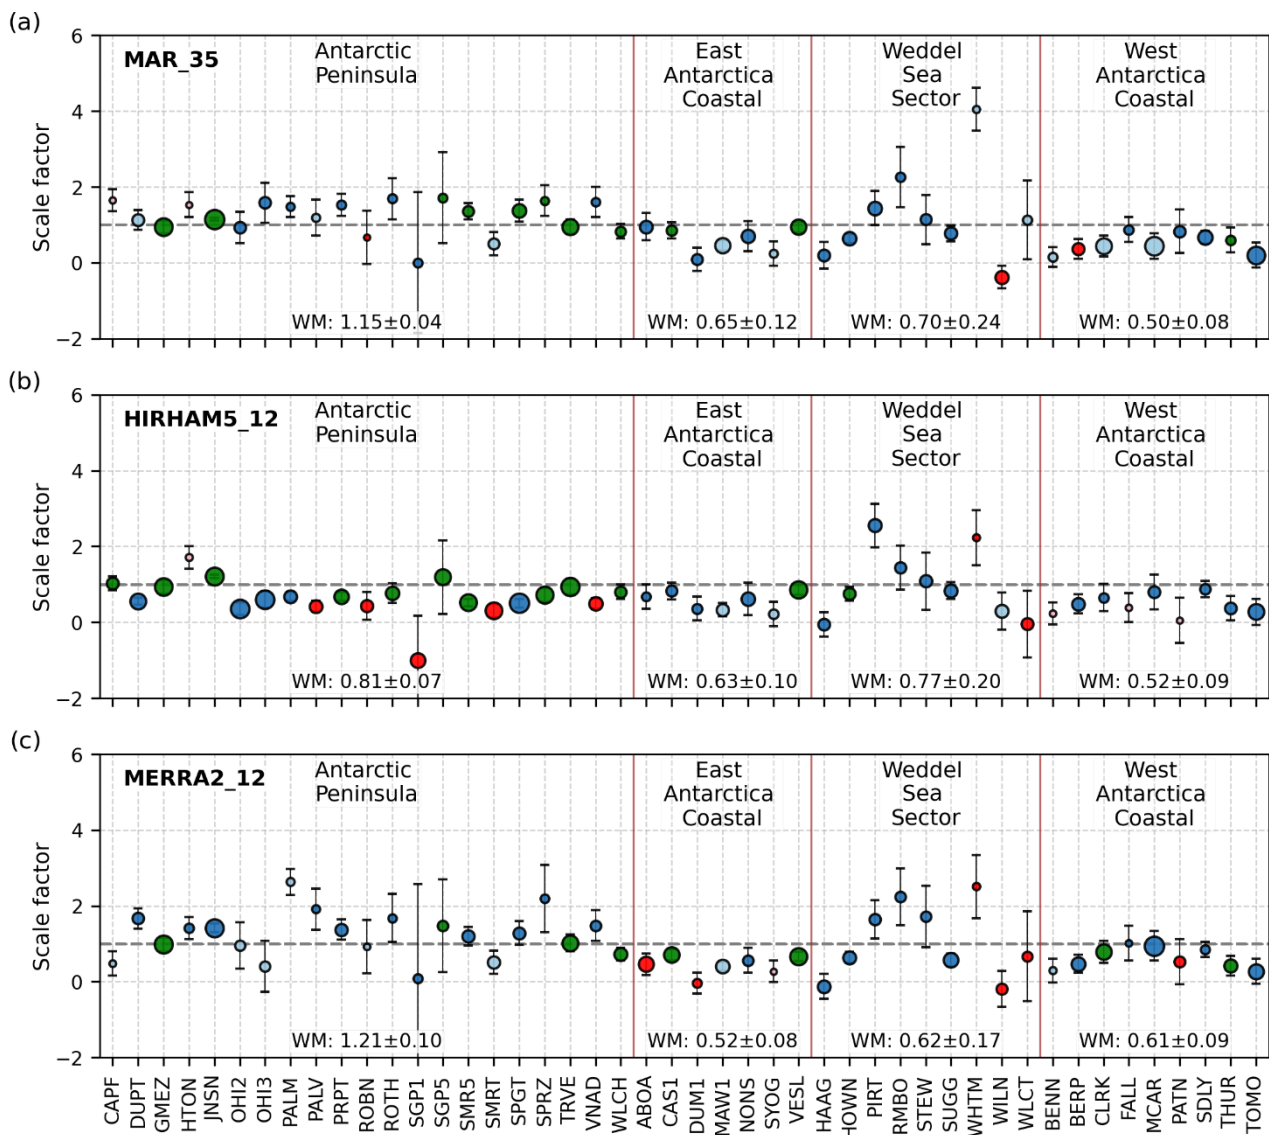

Figure S10: Scale factors and associated uncertainty for (a) MAR\_35, (b) HIRHAM5\_12 and (c) MERRA2\_12 models grouped by geographical region. The size of the markers indicates the respective SMBL IQR and the colours indicates the categories of the stations as in Figure 5. Error bars indicate a 1-sigma uncertainty. The horizontal dashed line marks a scale of 1.

50

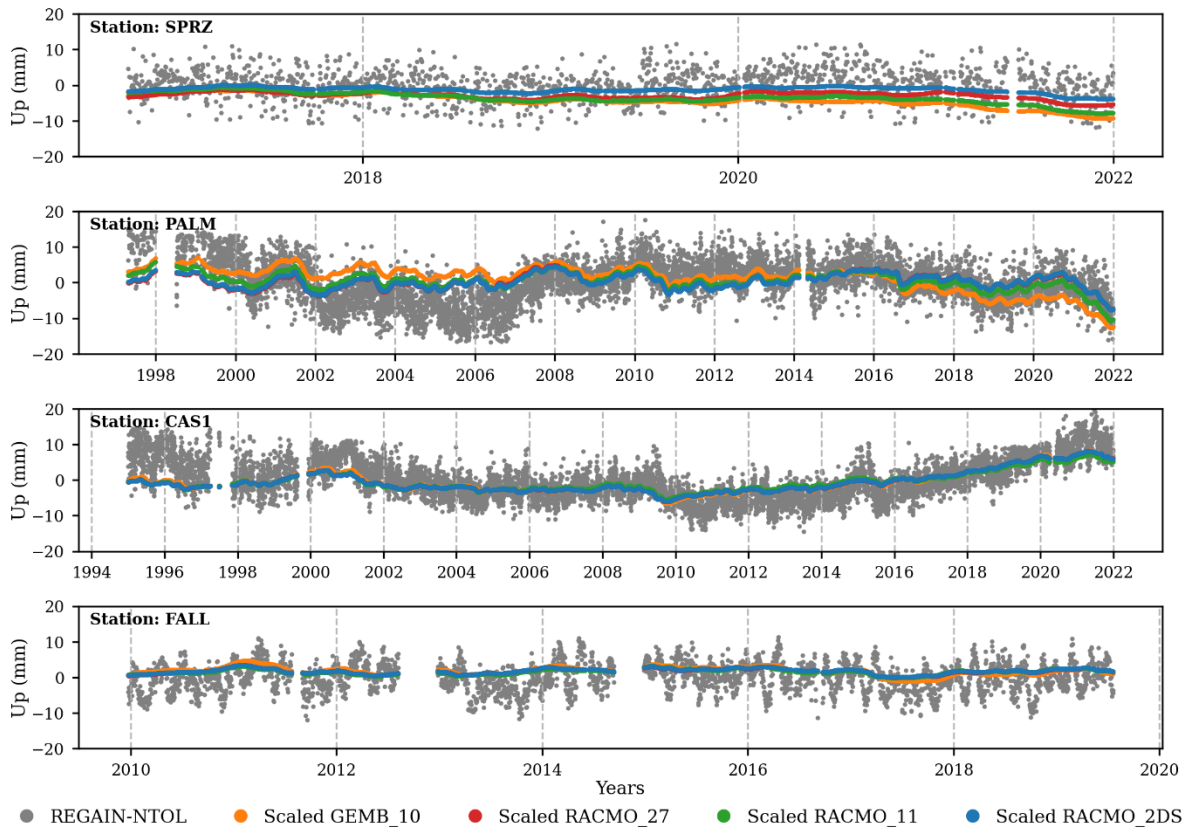

**Figure S11: Comparison between detrended scaled SMBL time series with detrended REGAIN-NTOL time series. Grey dots show the detrended REGAIN-NTOL vertical timeseries in all panes. Panels (a-d) correspond to stations SPRZ, PALM, CAS1 and FALL respectively and show detrended vertical SMBL time series from GEMB\_10 (orange), RACMO\_27 (red), RACMO\_11 (green) and RACMO\_2DS (red).**

55

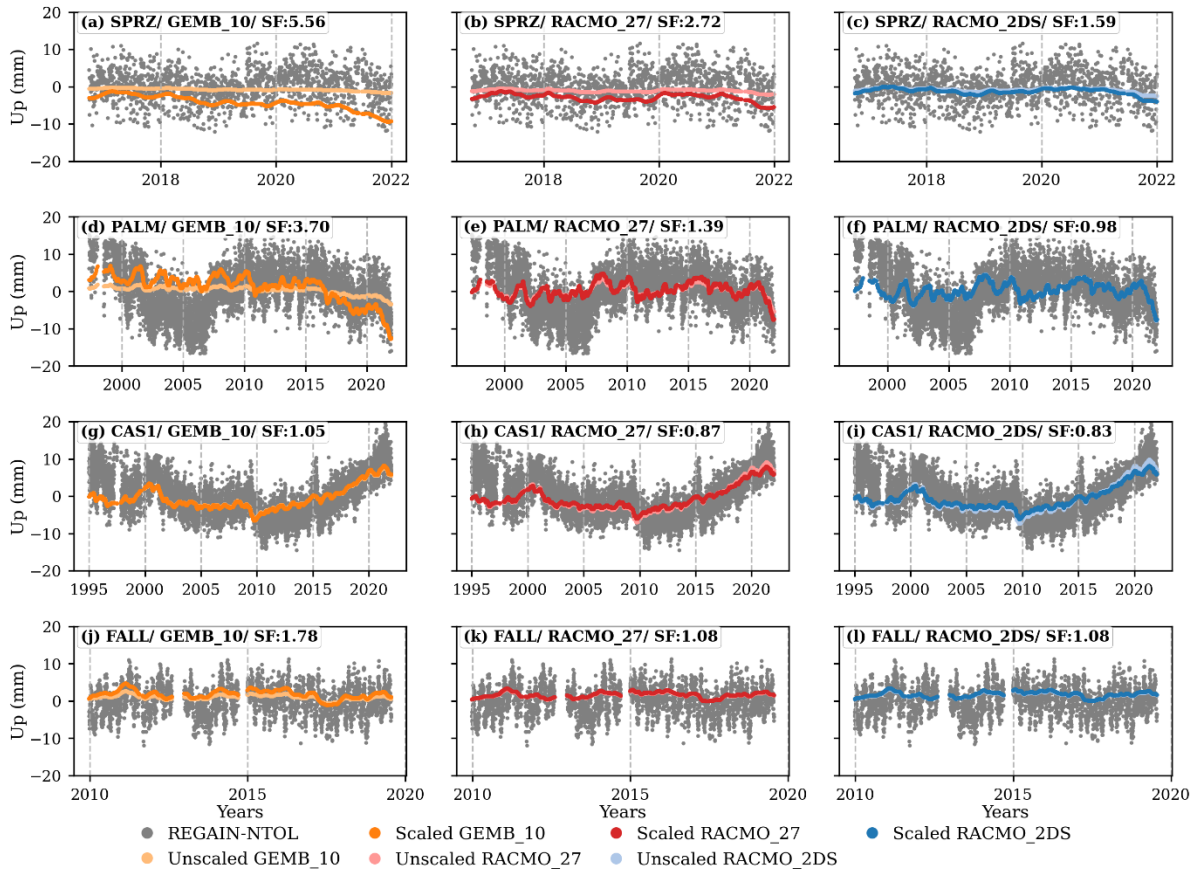

Figure S12: Comparison between detrended SMBL time series and their scaled counterparts with the REGAIN-NTOL time series. Grey dots show the detrended REGAIN-NTOL vertical timeseries in all panes. Panels (a-c), (d-f), (g-i) and (j-l) corresponds to stations SPRZ, PALM, CAS1 and FALL, respectively, and show unscaled (light-coloured dots) and scaled SMBL (dark-coloured dots) from GEMB\_10 (orange), RACMO\_27 (red) and RACMO\_2DS (blue).

60
